# Supplementary material for: Effect of In Ovo Administration of a Multi-Strain Probiotic and Zinc Glycine Chelate on Antioxidant Capacity and Selected Immune Parameters in Newly Hatched Chicks
Source: MDPI journal article supplement (doi:10.3390/antiox12111905), 2023-10-24
Supplement: s1 [file s1]

**Supplementary Table S1:** Comparison of the concentrations of IL-10, IFN- $\gamma$ , TNF- $\alpha$ , corticosterone, and Hsp 70, and the mean activity of catalase and superoxide dismutase (SOD) in chicken serum and tissues.

| Parameters              | Group | N = | 12 hours      |                 |                 |                 |                 | 7 days         |                 |                 |                 |
|-------------------------|-------|-----|---------------|-----------------|-----------------|-----------------|-----------------|----------------|-----------------|-----------------|-----------------|
|                         |       |     | Serum         | Liver           | Small intestine | Large intestine | Yolk sac        | Serum          | Liver           | Small intestine | Large intestine |
| Corticosterone<br>ng/ml | I     | 30  | 0.85±0.41***  | 2.24±0.62***    | 3.05±0.13**     | 2.45±0.25***    | 1.13±0.29**     | 1.03±0.33***   | 2.20±1.04**     | 1.86±0.24       | 1.67±0.56**     |
|                         | II    |     | 0.19±0.01***  | 0.47±0.10***    | 2.54±0.46**     | 3.17±0.77***    | 0.38±0.25**     | 0.8±0.27***    | 0.43±0.24**     | 1.86±0.50       | 1.12±0.24**     |
|                         | III   |     | 0.56±0.40***  | 8.38±2.45***    | 3.60±0.30**     | 4.12±0.24***    | 0.89±0.07**     | 0.34±0.16***   | 1.53±0.14**     | 2.22±0.07       | 1.47±0.60**     |
|                         | IV    |     | 1.32±0.14***  | 2.55±0.26***    | 3.73±0.21**     | 0.82±0.28***    | 1.37±0.55**     | 2.54±0.37***   | 1.08±0.37**     | 3.41±1.65       | 2.08±0.63**     |
| SOD U/ml                | I     | 30  | 0.034±0.0049* | 0.327±0.0237    | 0.1±0.0006***   | 0.102±0.0107**  | 0.372±0.0087*** | 0.039±0.0023   | 0.323±0.0165*** | 0.049±0.0039*** | 0.155±0.0261**  |
|                         | II    |     | 0.033±0.002*  | 0.334±0.0112    | 0.159±0.0112*** | 0.17±0.0097**   | 0.474±0.0531*** | 0.041±0.0051   | 0.219±0.0033*** | 0.123±0.0052*** | 0.155±0.0189**  |
|                         | III   |     | 0.038±0.0011* | 0.344±0.0151    | 0.135±0.0142*** | 0.115±0.0053**  | 0.337±0.0217*** | 0.040±0.0014   | 0.237±0.0072*** | 0.11±0.0051***  | 0.121±0.0238**  |
|                         | IV    |     | 0.034±0.0025* | 0.306±0.0344    | 0.066±0.011***  | 0.137±0.0307**  | 0.309±0.0306*** | 0.042±0.0008   | 0.233±0.0117*** | 0.114±0.018***  | 0.089±0.0203**  |
| Catalase<br>μM/min/ml   | I     | 30  | 21.14±5.66    | 414.91±9.10*    | 142.9±70.71*    | 148.73±3.66**   | 415.45±11.10*   | 18.83±4.28***  | 425.63±11.99**  | 420.86±4.33***  | 380.12±31.69**  |
|                         | II    |     | 18.53±3.58    | 423.39±9.93*    | 129.08±27.32*   | 286.13±113.01** | 420.89±5.16*    | 67.11±6.28***  | 422.51±5.05**   | 406.63±3.06***  | 423.90±5.65**   |
|                         | III   |     | 12.96±1.04    | 407.62±3.39*    | 263.39±57.99*   | 162.62±58.83**  | 411.85±3.59*    | 9.85±0.52***   | 413.08±5.22**   | 226.15±69.65*** | 334.62±16.63    |
|                         | IV    |     | 15.83±7.08    | 422.9±70*       | 186.9±26.84*    | 379.73±25.73**  | 415.45±11.10*   | 25.74±2.63***  | 414.8±1.98**    | 410.64±4.43***  | 381.09±47.07    |
| Hsp70 ng/ml             | I     | 30  | 1.66±0.74**   | 5.39±0.24***    | 1.16±0.05**     | 2.89±0.23***    | 20.06±4.36      | 4.33±0.26      | 4.69±0.15***    | 4.79±0.15***    | 4.76±0.28**     |
|                         | II    |     | 1.8±1.01**    | 4.57±0.27***    | 2.18±1.17**     | 1.43±0.74***    | 24.34±2.38      | 3.9±0.49       | 4.3±0.08***     | 4.43±0.35***    | 4.44±0.39**     |
|                         | III   |     | 4.38±0.28**   | 4.36±0.16***    | 3.86±0.19**     | 1.31±0.05***    | 25±1.20         | 2.72±0.28      | 4.60±0.11***    | 4.69±0.2***     | 4.03±0.05**     |
|                         | IV    |     | 7.58±4.12**   | 5.23±0.25***    | 2.73±0.22**     | 4.39±0.16***    | 24.22±1.53      | 5.27±0.19      | 5.51±0.37***    | 4.76±0.07***    | 5.07±0.32**     |
| TNF- $\alpha$ ng/ml     | I     | 30  | 56.73±4.90**  | 550.2±106.76*** | 132.87±26.70*** | 66.35±8.56      | 52.41±10.06***  | 20.27±2.09***  | 204.23±46.52*** | 81.56±30.69     | 117.72±13.49**  |
|                         | II    |     | 30.76±4.89**  | 356.34±23.12*** | 61.54±11.50***  | 123.5±16.06     | 60.14±7.14***   | 6.76±0.89***   | 253.08±44.32*** | 102.13±4.30     | 101.48±43.84**  |
|                         | III   |     | 19.69±3.43**  | 319.96±29.16*** | 72.67±9.29***   | 85.08±8.10      | 41.7±14.90***   | 16.32±1.73***  | 343.97±22.48*** | 106.55±20.18    | 181.5±16.24***  |
|                         | IV    |     | 75.13±10.89** | 259.55±79.18*** | 128.65±24.72*** | 195.68±19.1     | 93.84±39.19***  | 72.37±10.56*** | 371.58±69.12*** | 98.33±36.45     | 110.35±45.11**  |

|                |    |     |                         |                          |                        |                        |                 |                        |                         |                        |                         |
|----------------|----|-----|-------------------------|--------------------------|------------------------|------------------------|-----------------|------------------------|-------------------------|------------------------|-------------------------|
| IL-10<br>pg/ml | 30 | I   | <b>1521.42±546.46*</b>  | 7407.56±176.91***        | <b>110.7±54.99***</b>  | <b>67.84±17.08***</b>  | 832.22±357.25   | <b>145.34±85.59</b>    | 7046.02±667.56*         | <b>853.59±444.08*</b>  | <b>1242.18±356.25**</b> |
|                |    | II  | 1386.39±680.52*         | 7483.41±289.48***        | <b>217.88±70.55***</b> | <b>96.96±21.9***</b>   | 975.73±534.26   | 75.2±7.79              | 7435.1±320.29*          | <b>1083.95±525.65*</b> | <b>1752.28±57.94**</b>  |
|                |    | III | <b>516.19±208.23*</b>   | <b>4586.4±134.03***</b>  | 424.24±157.14***       | <b>129.41±29.9***</b>  | 463.41±36.41    | <b>121.26±97.74</b>    | <b>6650.28±255.04*</b>  | 627.9±54.88*           | <b>2468.45±531.25**</b> |
|                |    | IV  | <b>1786.3±571.19*</b>   | <b>3504.83±2327.4***</b> | <b>55.45±24.65***</b>  | <b>402.92±49.79***</b> | 1197.24±71.54   | <b>215.9±123.76</b>    | <b>7115.58±185.92*</b>  | <b>1605.8±392.85*</b>  | <b>1266.58±129.41**</b> |
| INF γ<br>pg/ml | 30 | I   | <b>2122.28±620.21**</b> | 2551.24±709.07***        | <b>144.67±8.49***</b>  | <b>103.84±38.32***</b> | 64.83±15.23***  | <b>25.26±6.08***</b>   | 2429.4±280.1***         | <b>467.7±111.08**</b>  | <b>509.9±65.11**</b>    |
|                |    | II  | <b>1293.09±842.93**</b> | <b>4183.56±232.94***</b> | <b>88.73±13.73***</b>  | <b>37.84±10.17***</b>  | 226.25±55.48*** | <b>11.82±1.57***</b>   | <b>2841.97±58.9***</b>  | <b>424.03±7.75**</b>   | <b>381.61±72.66**</b>   |
|                |    | III | <b>367.73±191.37**</b>  | <b>1470.88±207.9***</b>  | <b>41.11±4.2***</b>    | <b>96.11±29.73***</b>  | 89.28±17.89***  | <b>92.14±64.37***</b>  | <b>2280.03±213.1***</b> | <b>376.04±23.69**</b>  | <b>519.96±163.62**</b>  |
|                |    | IV  | <b>2591.68±775.47**</b> | <b>2728.03±510.74***</b> | <b>141.4±19.49***</b>  | <b>195.15±37.25***</b> | 285.59±77.69*** | <b>304.65±43.61***</b> | 3305.02±111.75***       | <b>282.48±74.27**</b>  | <b>835.91±84**</b>      |

Values are expressed as mean and standard deviation (±SD). One-way ANOVA and the Mann–Whitney U test were used to show the statistical significance of differences in the serum and tissues of broiler chickens at 12 hours after hatching and at 7 days of age. Level of statistical significance: \* —  $p < 0.05$ , \*\* —  $p < 0.001$ , \*\*\* —  $p < 0.0001$ . Lower-case letters (a, b, c) indicate differences shown in Kruskal–Wallis ANOVA and post-hoc tests. The same letter designations indicate no statistically significant differences. Significant differences in the Mann–Whitney U test between groups at the analysis times are shown in bold. I - control group – eggs injected with sterile 0.9% physiological saline solution; group II - eggs injected with a multi-strain probiotic ( $1 \times 10^5$  CFU *S. cerevisiae*,  $1 \times 10^7$  CFU *L. casei*, and  $1 \times 10^7$  CFU *L. plantarum*); group III - eggs injected with a multi-strain probiotic ( $1 \times 10^5$  CFU *S. cerevisiae*,  $1 \times 10^7$  CFU *L. casei*, and  $1 \times 10^7$  CFU *L. plantarum*) and zinc glycine chelate (Zn-Gly); group IV - eggs injected with zinc glycine chelate (Zn-Gly). SD - standard deviation. N - number of samples of serum, liver, pectoral muscle, heart, small intestine and yolk sac, tested in each group at 12 hours after hatching and at 7 days of age.
